# Supplementary material for: Surface state modulation for size-controllable photodeposition of noble metal nanoparticles on semiconductors
Source: Royal Society of Chemistry journal article supplement (doi:10.1039/c9ta14181b), 2020-01-01
Supplement: c9ta14181b1.pdf [file c9ta14181b1.pdf]

## *Supporting Information*

### **Surface States Modulation for Size-Controllable Photodeposition of Noble Metal Nanoparticles on Semiconductors**

*Lei Huang<sup>a\*</sup>, Xiu Liu<sup>a,#</sup>, Haocheng Wu<sup>a,#</sup>, Xiuli Wang<sup>b</sup>, Hongmin Wu<sup>a</sup>, Rengui Li<sup>b\*</sup>,  
Liyi Shi<sup>a</sup> and Can Li<sup>b</sup>*

<sup>a</sup> Research Center of Nano Science and Technology, Shanghai University, Shanghai 200444, P. R. China.

<sup>b</sup> State Key Laboratory of Catalysis, Dalian Institute of Chemical Physics, Chinese Academy of Sciences, Zhongshan Road 457, Dalian 116023, China.

<sup>#</sup> Both authors contributed equally to this work.

\*Corresponding authors: [leihuang@shu.edu.cn](mailto:leihuang@shu.edu.cn) (L. Huang); [rgli@dicp.ac.cn](mailto:rgli@dicp.ac.cn) (R. G. Li).

Table S1. The designed and ICP estimated loading amount

| <b>Sample</b>                  | <b>Designed loading amount<br/>(wt.%)</b> | <b>Loading amount<br/>estimated by ICP (wt.%)</b> |
|--------------------------------|-------------------------------------------|---------------------------------------------------|
| <b>Ag/TiO<sub>2</sub>(A)-9</b> | 2.5                                       | 2.50                                              |
| <b>Ag/TiO<sub>2</sub>(A)-2</b> | 2.5                                       | 2.49                                              |
| <b>Pt/TiO<sub>2</sub>(A)-6</b> | 2.5                                       | 2.48                                              |
| <b>Au/TiO<sub>2</sub>(A)-6</b> | 2.5                                       | 2.47                                              |
| <b>Pd/TiO<sub>2</sub>(A)-6</b> | 2.5                                       | 2.47                                              |

Table S2 A summary of size distribution of different metal nanoparticles based on the size statistics results.

| <b>Sample</b> | <b>TiO<sub>2</sub></b> | <b>Metal precursor</b>           | <b>pH values</b> | <b>Size distribution</b> |
|---------------|------------------------|----------------------------------|------------------|--------------------------|
| 1             | Anatase                | AgNO <sub>3</sub>                | 2.0              | 4.2-72 nm                |
| 2             | Anatase                | AgNO <sub>3</sub>                | 4.5              | 10.3-39.6 nm             |
| 3             | Anatase                | AgNO <sub>3</sub>                | 9.0              | 0.6-2.3 nm, 2.9-16.9 nm  |
| 4             | Rutile                 | AgNO <sub>3</sub>                | 2.0              | 7.9-128 nm               |
| 5             | Rutile                 | AgNO <sub>3</sub>                | 6.0              | 0.7-2.3nm, 8-30.8 nm     |
| 6             | Rutile                 | AgNO <sub>3</sub>                | 9.0              | 0.71-37.6 nm             |
| 7             | Anatase                | H <sub>2</sub> PtCl <sub>6</sub> | 2.0              | 1.3-20.2 nm              |
| 8             | Anatase                | H <sub>2</sub> PtCl <sub>6</sub> | 4.5              | 1.7-4 nm                 |
| 9             | Anatase                | H <sub>2</sub> PtCl <sub>6</sub> | 9.0              | 1.1-13 nm                |
| 10            | Rutile                 | H <sub>2</sub> PtCl <sub>6</sub> | 6.0              | 1.3-6 nm                 |
| 11            | Anatase                | HAuCl <sub>4</sub>               | 4.5              | 2.4-34.4 nm              |
| 12            | Rutile                 | HAuCl <sub>4</sub>               | 6.0              | 5.3-44.2 nm              |
| 13            | Anatase                | PdCl <sub>2</sub>                | 4.5              | 3-20.2 nm                |
| 14            | Rutile                 | PdCl <sub>2</sub>                | 6.0              | 0.3-1.7nm, 2.3-9.4 nm    |

Table S3 A summary of size distribution of different metal nanoparticles obtained with different surface charge and metal precursors.

| <b>Samples</b>               | <b>Surface charge</b> | <b>Metal Precursors</b>          | <b>Size distribution</b> |
|------------------------------|-----------------------|----------------------------------|--------------------------|
| Ag/TiO <sub>2</sub> (R)-2.0  | 44.6                  | AgNO <sub>3</sub>                | 7.9-128 nm               |
| Ag/TiO <sub>2</sub> (R)-6.0  | -22                   | AgNO <sub>3</sub>                | 0.7-2.3 nm,<br>8-30.8 nm |
| Ag/TiO <sub>2</sub> (R)-9.0  | -38                   | AgNO <sub>3</sub>                | 0.71-37.61 nm            |
| Pt/ TiO <sub>2</sub> (R)-6.0 | -22                   | H <sub>2</sub> PtCl <sub>6</sub> | 1.3-6 nm                 |
| Au/ TiO <sub>2</sub> (R)-6.0 | -22                   | HAuCl <sub>4</sub>               | 5.3-44.2 nm              |
| Pd/ TiO <sub>2</sub> (R)-6.0 | -22                   | PdCl <sub>2</sub>                | 0.3-1.7nm,<br>2.3-9.4 nm |
| Ag/TiO <sub>2</sub> (A)-4.5  | 4.5                   | AgNO <sub>3</sub>                | 10.3-39.6 nm             |
| Pt/ TiO <sub>2</sub> (A)-4.5 | 4.5                   | H <sub>2</sub> PtCl <sub>6</sub> | 1.7-4 nm                 |
| Au/ TiO <sub>2</sub> (A)-4.5 | 4.5                   | HAuCl <sub>4</sub>               | 2.4-34.4 nm              |
| Pd/ TiO <sub>2</sub> (A)-4.5 | 4.5                   | PdCl <sub>2</sub>                | 3-20.2 nm                |

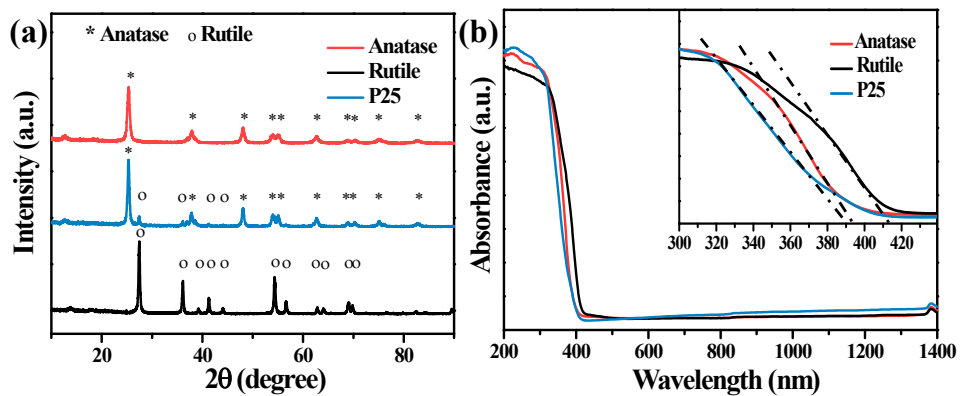

**Figure S1.** The XRD patterns (a) and UV-vis spectra (b) of anatase, rutile and P25. The inset in (b) is the amplified UV-vis spectra.

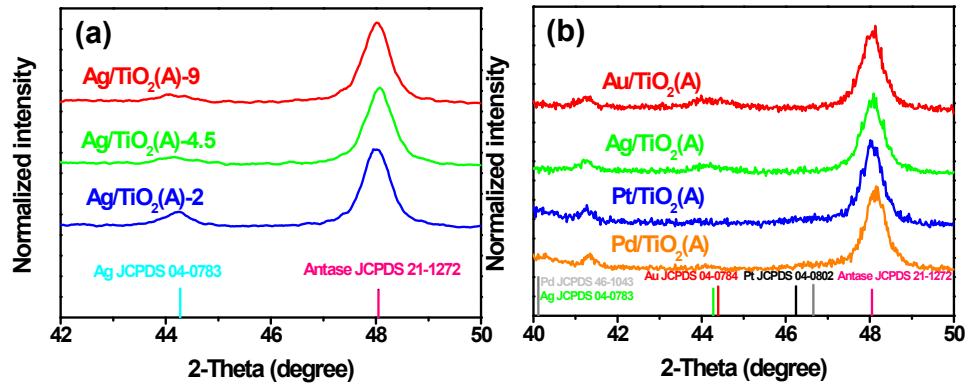

**Figure S2.** XRD patterns of different samples: (a) Ag/TiO<sub>2</sub>(A) prepared at different pH and (b) different metals on TiO<sub>2</sub>(A)-4.5.

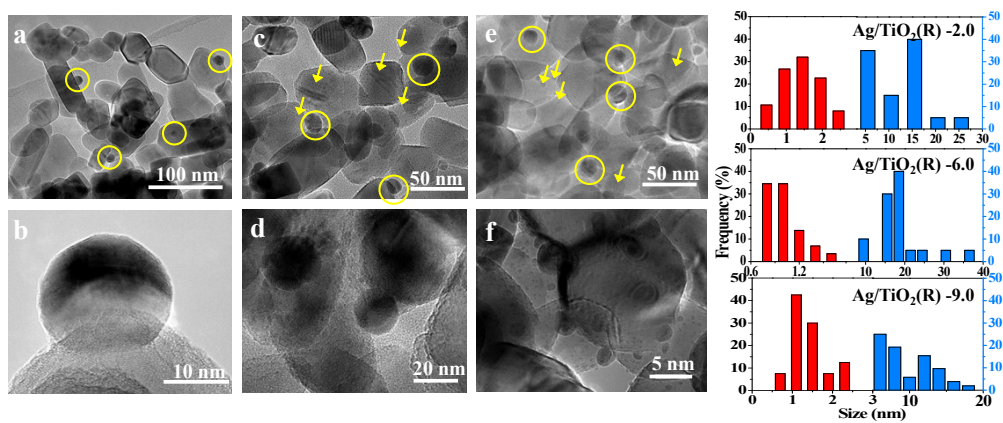

**Figure S3.** TEM and HRTEM images of (a-b) Ag/TiO<sub>2</sub>(R)-2, (c-d) Ag/TiO<sub>2</sub>(R)-6, (e-f) Ag/TiO<sub>2</sub>(R)-9 and corresponding particle size distribution.

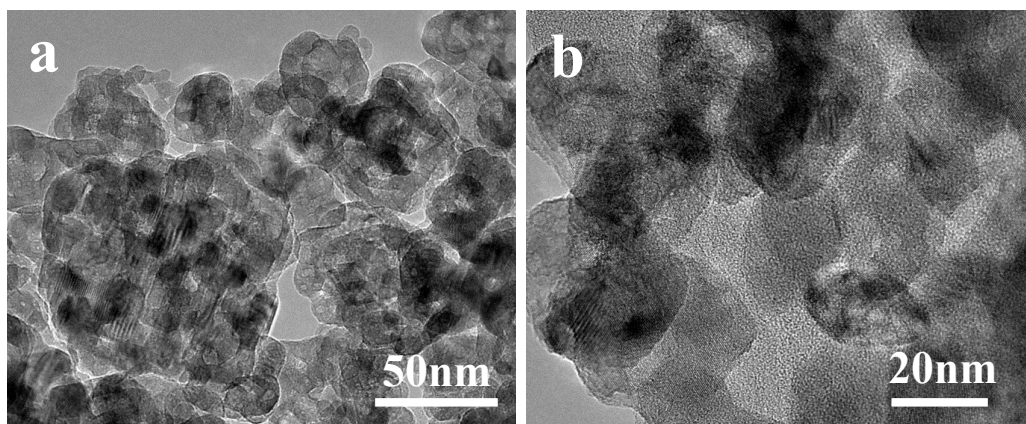

**Figure S4.** TEM images of  $\text{TiO}_2(\text{A})$  impregnation in the  $\text{AgNO}_3$  solution (pH=9) without irradiation.



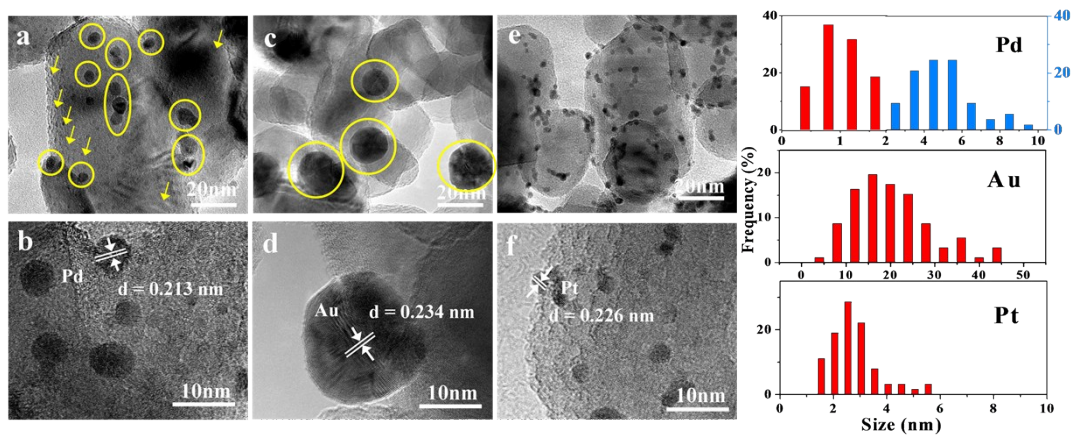

**Figure S5.** HRTEM images of (a-b) Pd/TiO<sub>2</sub>(R)-6.0, (c-d) Au/TiO<sub>2</sub>(R)-6.0, (e-f) Pt/TiO<sub>2</sub>(R)-6.0 and corresponding particle size distribution. The yellow circles and the arrows indicate the type I and type II nanoparticles, respectively.

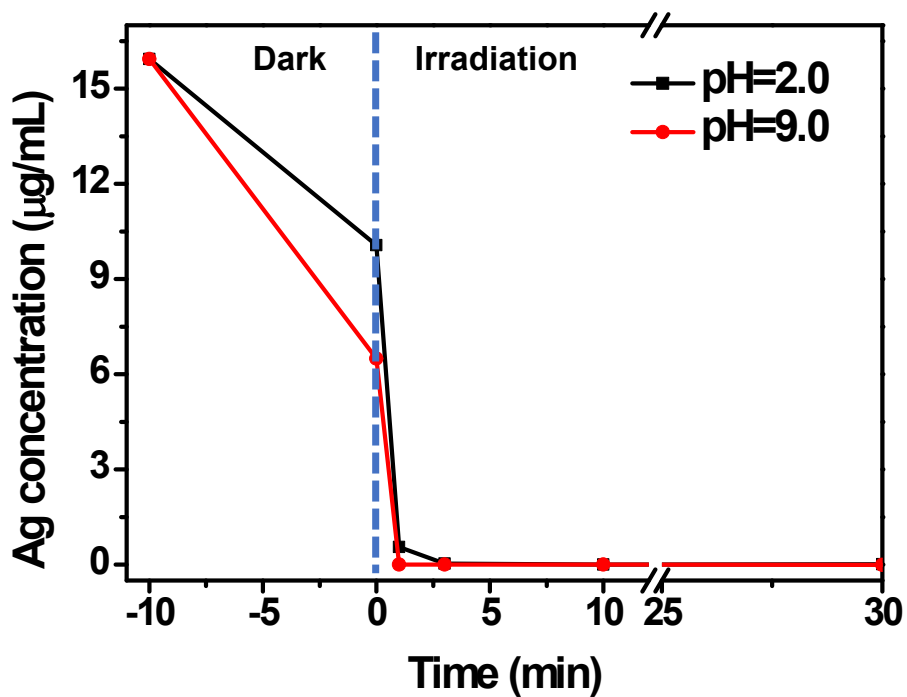

**Figure S6.** The evolution of Ag concentration in the solution during photodeposition on  $\text{TiO}_2(\text{A})\text{-}2.0$  and  $\text{TiO}_2(\text{A})\text{-}9.0$ .

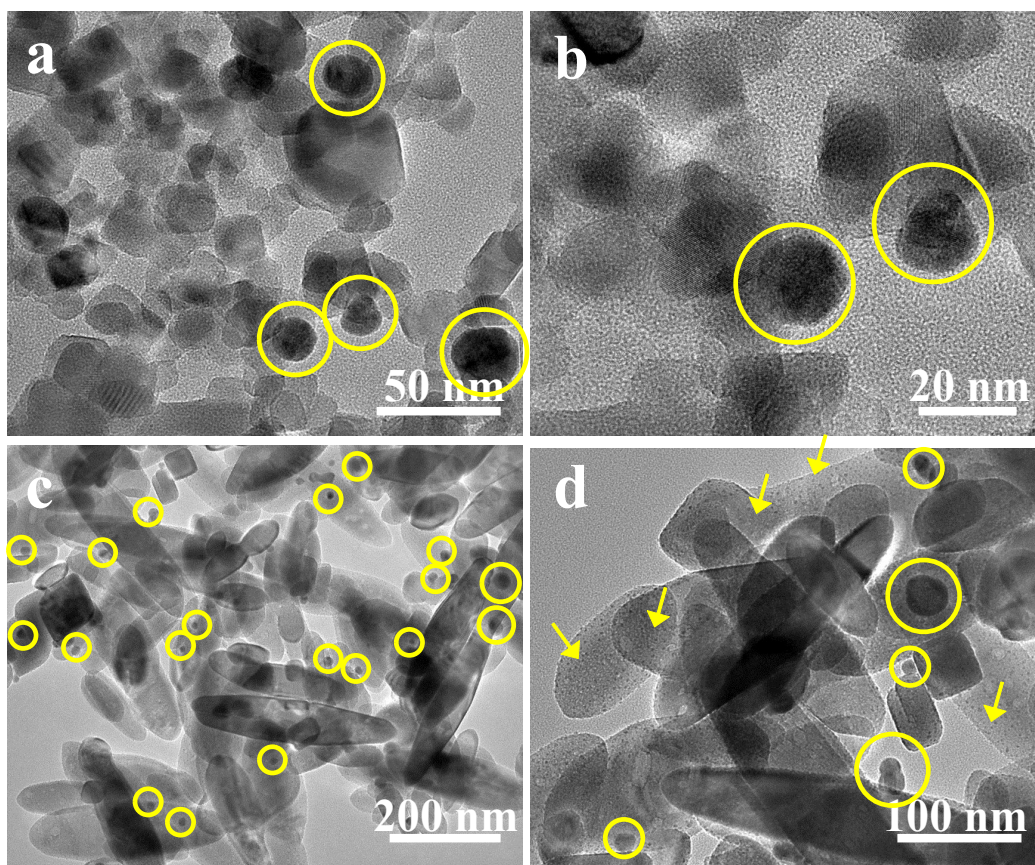

**Figure S7.** TEM and HRTEM images of (a, b) Ag/TiO<sub>2</sub>(P25), (c, d) Ag/TiO<sub>2</sub>(anatase rod). The yellow cycles and the arrows are indicating the type I and type II Ag nanoparticles, respectively.

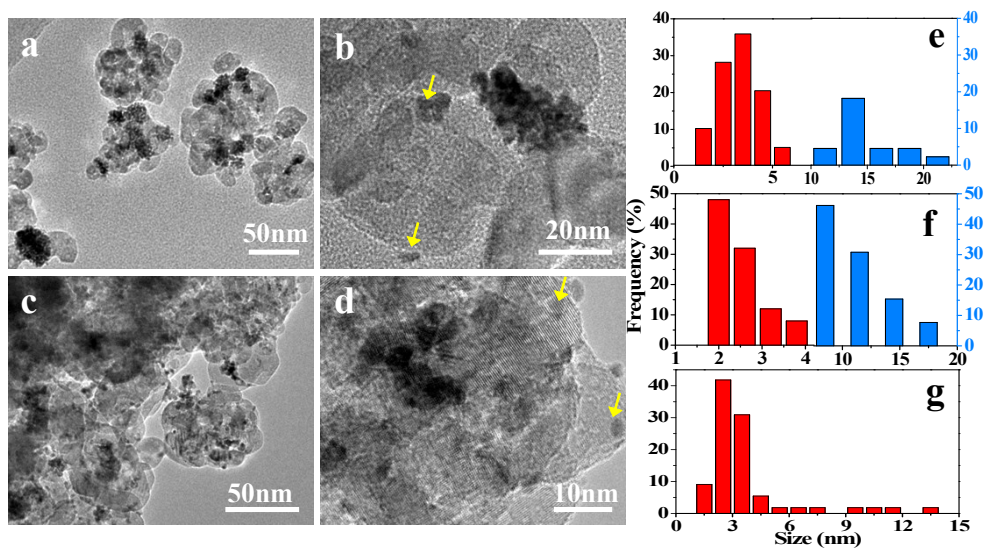

**Figure S8.** TEM images of Pt photodeposited on anatase TiO<sub>2</sub> at the pH of 2.0 (a, b) and 9.0 (c, d). (e-g) are the size distribution of Pt nanoparticles at the pH of 2.0, 4.5 and 9.0, respectively.

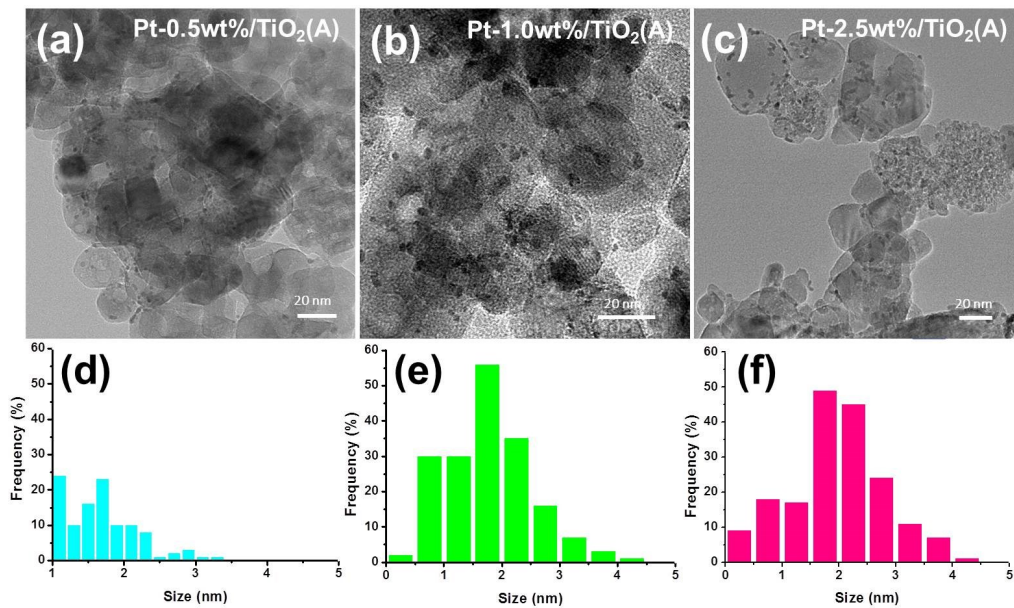

**Figure S9.** TEM image and size distribution of Pt on TiO<sub>2</sub> for different samples: (a) and (d) for 0.5 wt.% Pt/TiO<sub>2</sub>(A)-6.0, (b) and (e) for 1.0 wt.% Pt/TiO<sub>2</sub>(A)-6.0, (c) and (f) for 2.5 wt.% Pt/TiO<sub>2</sub>(A)-6.0.

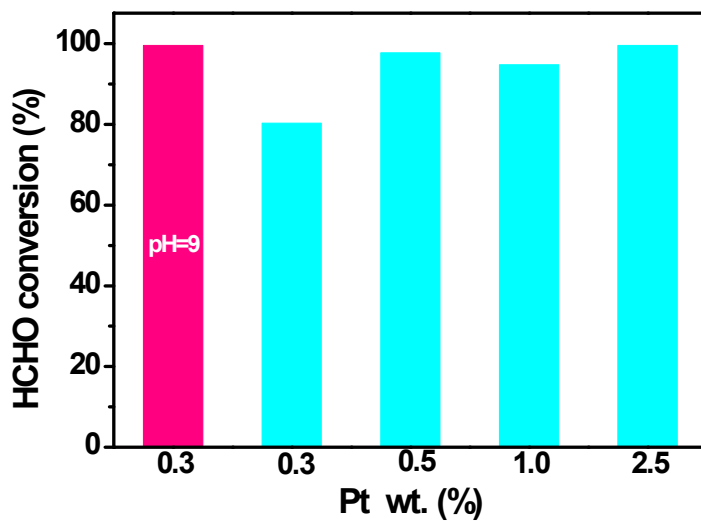

**Figure S10.** The influence of Pt loading amount for Pt/TiO<sub>2</sub>(A) at pH 6.0 on HCHO conversion at room temperature.

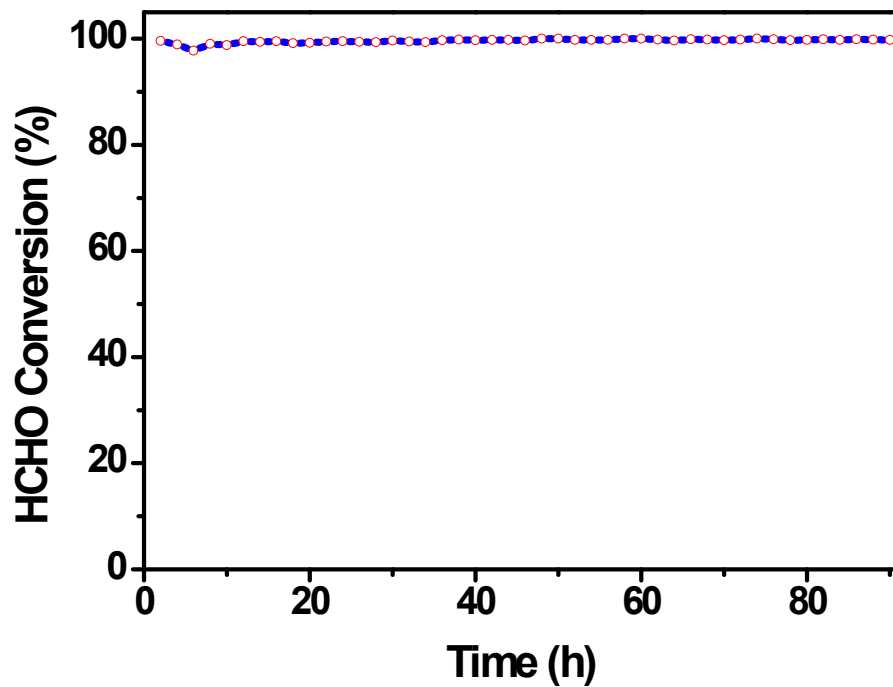

**Figure S11** The longevity of 0.3wt.% Pt/TiO<sub>2</sub>(A)-9 for 90 h at a total gas flow rate of 250 mL min<sup>-1</sup> and the concentration of HCHO is 300 ppm.
